# Supplementary material for: Subjective well-being patterns in older men and women without someone to confide in: a latent class analysis approach
Source: Frontiers journal article supplement (doi:10.3389/fpubh.2023.1286627), 2024-01-05
Supplement: Data_Sheet_1.pdf [file Data_Sheet_1.pdf]

## ***Supplementary Material***

Figure S1: Flow chart of the study sample.

Table S1: Differences in median SWB score among respondents with and without a close confidant.

Table S2: Conditional probability of SWB indicators among three classes.

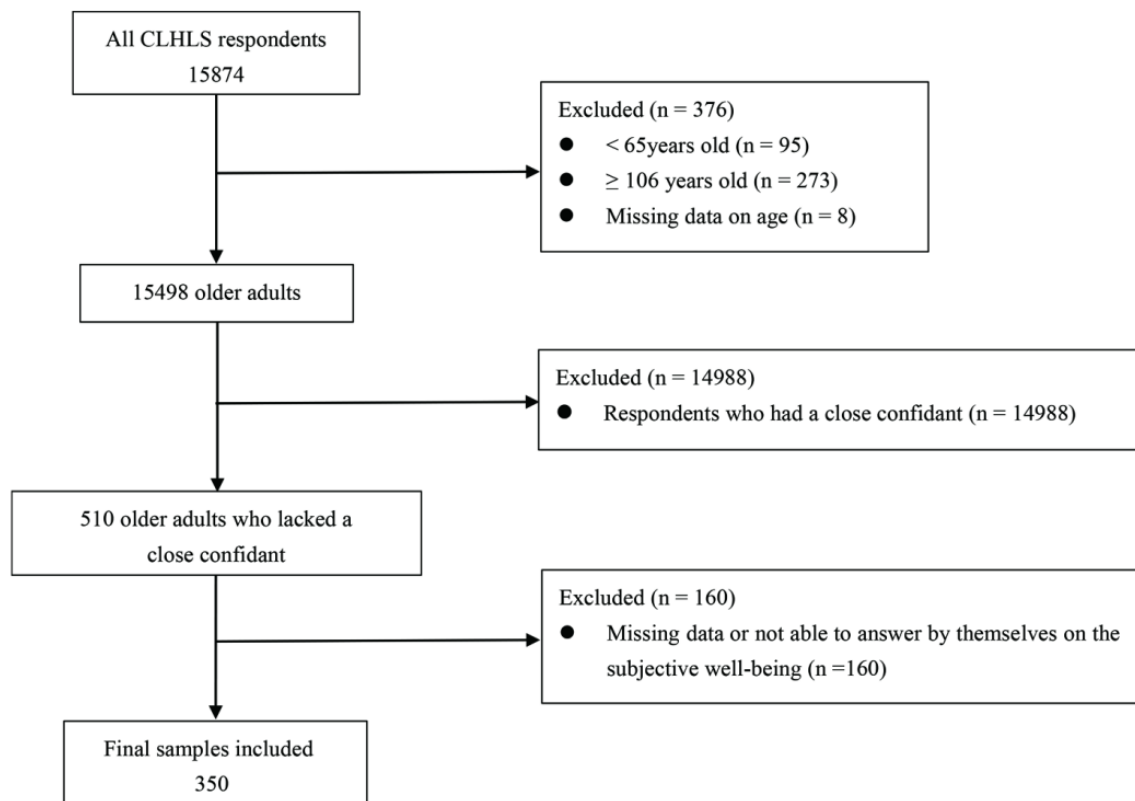

**Fig. S1. Flow chart of the study sample.**

**Table S1: Differences in median SWB score among respondents with and without a close confidant.**

| SWB score          | With a close<br>confidant (n=12,274) | Without a close<br>confidant (n=350) | Total<br>(n=12,624) | Z     | P      |
|--------------------|--------------------------------------|--------------------------------------|---------------------|-------|--------|
| median (Q1,<br>Q3) | 23.0 (20,25)                         | 22.0 (19,25)                         | 23.0 (20,25)        | 3.798 | <0.001 |
| range              | 6-30                                 | 7-30                                 | 6-30                |       |        |

*Note.* Excluding samples with missing SWB items, a total of 12624 older people

**Table S2: Conditional probability of SWB indicators among three classes.**

| <b>Items</b>                            | <b>Answers</b>         | <b>Class 1</b> | <b>Class 2</b> | <b>Class 3</b> |
|-----------------------------------------|------------------------|----------------|----------------|----------------|
| life satisfaction                       | excellent              | 0.056          | 0.231          | 0.244          |
|                                         | good                   | 0.202          | 0.5            | 0.509          |
|                                         | so-so/bad/very bad     | 0.742          | 0.27           | 0.247          |
| look[ed] on the bright side of things   | always                 | 0.066          | 0.178          | 0.362          |
|                                         | often                  | 0.364          | 0.623          | 0.638          |
|                                         | sometimes/rarely/never | 0.57           | 0.199          | 0              |
| [were] as happy as when they were young | always                 | 0.05           | 0.386          | 0.59           |
|                                         | often                  | 0.002          | 0.246          | 0.127          |
|                                         | sometimes/rarely/never | 0.948          | 0.368          | 0.283          |
| felt fearful or anxious                 | never                  | 0.168          | 0.327          | 0.952          |
|                                         | rarely                 | 0.262          | 0.526          | 0.013          |
|                                         | sometimes/often/always | 0.57           | 0.147          | 0.035          |
| felt lonely                             | never                  | 0.062          | 0.223          | 0.859          |
|                                         | rarely                 | 0.082          | 0.466          | 0              |
|                                         | sometimes/often/always | 0.856          | 0.311          | 0.141          |
| self-perceived uselessness with age     | never                  | 0              | 0.082          | 0.68           |
|                                         | rarely                 | 0.071          | 0.482          | 0.105          |
|                                         | sometimes/often/always | 0.929          | 0.435          | 0.215          |
